# Supplementary material
Source: publisher site journal article supplement (https://www.spandidos-publications.com/2637/downloadSupplementary)
Supplement: Supplementary file 1 [file downloadSupplementary]

## Sheet: Table S13 Ras_GO_enrichment_P
Table SXIII. Ras_GO_enrichment_P.
#Term	Database	ID	Input number	Background number	P-value	Corrected P-value	Input	Hyperlink
nerve growth factor receptor signaling pathway	Gene Ontology	GO:0048011	19	273	4.1025e-05	0.00350111	ERBB3|APH1A|ARHGEF16|PLEKHG5|FGFR1|NR4A1|MCF2L|SH3GL2|MAPKAP1|UBA52|GRB2|TNRC6B|MAPK12|PRKACB|FGFR4|MLST8|RAF1|AGO3|RAPGEF1	http://amigo.geneontology.org/cgi-bin/amigo/term_details?term=GO:0048011
epidermal growth factor receptor signaling pathway	Gene Ontology	GO:0007173	15	191	6.86493e-05	0.00350111	ERBB3|CSK|FGFR1|NR4A1|MAPKAP1|UBA52|GRB2|TNRC6B|GRB7|PRKACB|FGFR4|MLST8|RAF1|AGO3|SH3GL2	http://amigo.geneontology.org/cgi-bin/amigo/term_details?term=GO:0007173
protein phosphorylation	Gene Ontology	GO:0006468	20	344	0.000301621	0.0102551	IGF1R|MAP4K2|SCYL3|NEK3|SGK1|PTK6|GTF2H1|CAB39|CDK16|MAP4K3|SMAD2|PRKAA2|CSK|CSNK1E|AURKA|AURKB|PRKACB|RAF1|STK38L|FGFR1	http://amigo.geneontology.org/cgi-bin/amigo/term_details?term=GO:0006468
phosphatidylinositol-mediated signaling	Gene Ontology	GO:0048015	11	137	0.000522722	0.0132052	ERBB3|IGF1R|NR4A1|MAPKAP1|GRB2|TNRC6B|AURKA|FGFR4|MLST8|AGO3|FGFR1	http://amigo.geneontology.org/cgi-bin/amigo/term_details?term=GO:0048015
fibroblast growth factor receptor signaling pathway	Gene Ontology	GO:0008543	12	163	0.000647312	0.0132052	ERBB3|NR4A1|MAPKAP1|UBA52|GRB2|TNRC6B|PRKACB|FGFR4|MLST8|RAF1|AGO3|FGFR1	http://amigo.geneontology.org/cgi-bin/amigo/term_details?term=GO:0008543
reciprocal meiotic recombination	Gene Ontology	GO:0007131	5	35	0.00147705	0.0251099	MSH5|PMS1|CCNB1IP1|RAD51B|LIG3	http://amigo.geneontology.org/cgi-bin/amigo/term_details?term=GO:0007131
protein ubiquitination involved in ubiquitin-dependent protein catabolic process	Gene Ontology	GO:0042787	6	54	0.00192092	0.0258051	HECTD2|WWP2|RNF43|NEDD4L|HERC4|RNF217	http://amigo.geneontology.org/cgi-bin/amigo/term_details?term=GO:0042787
transcription initiation from RNA polymerase II promoter	Gene Ontology	GO:0006367	12	186	0.00202393	0.0258051	SNW1|TBP|GTF2H1|NR4A1|SMAD2|NEDD4L|UBA52|NR2C1|VDR|NR1D2|CCNT2|AR	http://amigo.geneontology.org/cgi-bin/amigo/term_details?term=GO:0006367
double-strand break repair via homologous recombination	Gene Ontology	GO:0000724	6	60	0.00329689	0.0324382	SPIDR|MDC1|RAD51B|ZSWIM7|SWSAP1|MCM8	http://amigo.geneontology.org/cgi-bin/amigo/term_details?term=GO:0000724
insulin receptor signaling pathway	Gene Ontology	GO:0008286	10	149	0.00352666	0.0324382	ATP6V0B|IGF1R|GRB10|CAB39|PRKAA2|GRB2|FGFR4|MLST8|RAF1|FGFR1	http://amigo.geneontology.org/cgi-bin/amigo/term_details?term=GO:0008286
DNA repair	Gene Ontology	GO:0006281	15	280	0.00365779	0.0324382	MDC1|FAAP100|PARPBP|GTF2H1|FZR1|MUTYH|UBA52|CSNK1E|POLD4|LIG3|REV1|RTEL1|CLSPN|RAD51B|CHEK1	http://amigo.geneontology.org/cgi-bin/amigo/term_details?term=GO:0006281
gene expression	Gene Ontology	GO:0010467	28	672	0.0040007	0.0324382	VDR|EIF5|SMAD2|TNRC6B|EDC4|NR1D2|CCNT2|YWHAZ|SMG6|EIF3F|AARS2|MAGOH|RNMT|DCP2|GTF2H1|NR4A1|AR|IGF2BP2|SNW1|TBP|EEF1D|NEDD4L|UBA52|NR2C1|SSR4|CNOT4|AGO3|RPS2	http://amigo.geneontology.org/cgi-bin/amigo/term_details?term=GO:0010467
glycosphingolipid metabolic process	Gene Ontology	GO:0006687	5	44	0.00413428	0.0324382	B4GALNT1|ST6GALNAC6|CREM|ARSB|GLB1	http://amigo.geneontology.org/cgi-bin/amigo/term_details?term=GO:0006687
transcription, DNA-dependent	Gene Ontology	GO:0006351	62	1857	0.00571897	0.0416667	ZFX|KMT2C|HMX3|FOXP1|PRKAA2|SMAD2|GABPB1|ZNF18|MAPK12|PATZ1|ZNF780B|CCNT2|ZBTB44|ZSCAN2|ZNF721|CHD3|SERTAD3|CHD5|ZHX3|ZNF276|MEIS1|ZFP41|LINC00473|CAMTA1|PML|ZKSCAN5|MYRF|KDM2B|MECP2|DIDO1|ZKSCAN4|CCNL1|CCNL2|HOXD8|KMT2E|HOXB3|GTF2H1|ZNF600|ZNF232|AR|ZNF879|ZNF800|NPAT|FGFR1|ARID3B|LRRFIP1|CIRH1A|NR1D2|ARID1B|EEF1D|TCF7L2|ZSCAN32|NEDD4L|UBA52|HOXA4|KANK2|CREM|PBRM1|ZMIZ2|KDM1B|ZNF548|PHF3	http://amigo.geneontology.org/cgi-bin/amigo/term_details?term=GO:0006351
telomere maintenance	Gene Ontology	GO:0000723	5	53	0.00914987	0.0622191	SMG6|RTEL1|FBXO4|TERT|POLD4	http://amigo.geneontology.org/cgi-bin/amigo/term_details?term=GO:0000723
spermatogenesis	Gene Ontology	GO:0007283	16	346	0.0108456	0.0691404	ACVR2A|ZFX|B4GALNT1|LIMK2|TBP|CDK16|ZFP41|KDM2B|CREM|HERC4|LIG3|ELL3|PATZ1|ZSCAN2|TESK1|PAFAH1B2	http://amigo.geneontology.org/cgi-bin/amigo/term_details?term=GO:0007283
JNK cascade	Gene Ontology	GO:0007254	5	57	0.0123432	0.0740593	MAP3K10|MAP4K3|MAP4K2|NOD1|UBA52	http://amigo.geneontology.org/cgi-bin/amigo/term_details?term=GO:0007254
cell cycle arrest	Gene Ontology	GO:0007050	8	132	0.0154204	0.0839828	KMT2E|TBRG1|DST|CAB39|PRKAA2|TCF7L2|MAPK12|PML	http://amigo.geneontology.org/cgi-bin/amigo/term_details?term=GO:0007050
protein stabilization	Gene Ontology	GO:0050821	6	83	0.0156439	0.0839828	PEX6|TBRG1|ZSWIM7|GOLGA7|PML|SWSAP1	http://amigo.geneontology.org/cgi-bin/amigo/term_details?term=GO:0050821
protein autophosphorylation	Gene Ontology	GO:0046777	9	161	0.0170788	0.0840268	IGF1R|CSK|PTK6|CAMK2G|MAP3K10|AURKA|AURKB|FGFR4|FGFR1	http://amigo.geneontology.org/cgi-bin/amigo/term_details?term=GO:0046777
peptidyl-tyrosine dephosphorylation	Gene Ontology	GO:0035335	5	62	0.0172996	0.0840268	PTPN13|PTPRN|DUSP11|PTPN3|PTPRH	http://amigo.geneontology.org/cgi-bin/amigo/term_details?term=GO:0035335
cilium assembly	Gene Ontology	GO:0042384	6	86	0.018352	0.084279	SNX10|KIF24|FBF1|WDR19|TMEM107|B9D1	http://amigo.geneontology.org/cgi-bin/amigo/term_details?term=GO:0042384
negative regulation of catalytic activity	Gene Ontology	GO:0043086	5	64	0.0196038	0.084279	TNK2|ANXA2|RTKN|PPP1R12A|PRPSAP2	http://amigo.geneontology.org/cgi-bin/amigo/term_details?term=GO:0043086
negative regulation of transcription from RNA polymerase II promoter	Gene Ontology	GO:0000122	22	565	0.0206608	0.084279	VDR|WWP2|SMAD2|N4BP2L2|SMARCA2|SEMA4D|ZHX3|AURKB|KDM2B|HOXD8|HOXB3|MECP2|NR2C1|FGFR1|NFIC|SNW1|PKIG|ID2|TCF7L2|NEDD4L|UBA52|KANK2	http://amigo.geneontology.org/cgi-bin/amigo/term_details?term=GO:0000122
mRNA processing	Gene Ontology	GO:0006397	10	195	0.0211983	0.084279	SMN2|SREK1|PRPF38B|ARL6IP4|SON|U2AF1L4|PAPD4|PTBP3|CPSF4|THOC5	http://amigo.geneontology.org/cgi-bin/amigo/term_details?term=GO:0006397
regulation of transcription from RNA polymerase II promoter	Gene Ontology	GO:0006357	13	283	0.0214829	0.084279	CHD3|SNW1|LRRFIP1|GABPB1|TRAK1|TCF7L2|TARBP1|NFATC3|ZNF18|BRD8|SMARCA2|ZSCAN32|ATF2	http://amigo.geneontology.org/cgi-bin/amigo/term_details?term=GO:0006357
DNA replication	Gene Ontology	GO:0006260	8	147	0.0274011	0.103515	NFIC|CLSPN|TBRG1|TYMP|POLD4|REV1|CHEK1|MCM8	http://amigo.geneontology.org/cgi-bin/amigo/term_details?term=GO:0006260
microtubule-based movement	Gene Ontology	GO:0007018	5	72	0.0307956	0.106692	DNAH14|KIF24|DNAH1|DNAH11|KIF9	http://amigo.geneontology.org/cgi-bin/amigo/term_details?term=GO:0007018
Notch signaling pathway	Gene Ontology	GO:0007219	7	124	0.0318923	0.106692	APH1A|SNW1|POGLUT1|UBA52|TNRC6B|NUMB|AGO3	http://amigo.geneontology.org/cgi-bin/amigo/term_details?term=GO:0007219
protein ubiquitination	Gene Ontology	GO:0016567	12	269	0.0322204	0.106692	KLHL36|RNF170|RNF169|RNF43|NEDD4L|FBXO4|CCNB1IP1|RNF38|RNF138|WWP2|RNF123|DCAF6	http://amigo.geneontology.org/cgi-bin/amigo/term_details?term=GO:0016567
wound healing	Gene Ontology	GO:0042060	5	73	0.0324259	0.106692	ERBB3|C6orf89|TPM1|DSP|RAF1	http://amigo.geneontology.org/cgi-bin/amigo/term_details?term=GO:0042060
embryo development	Gene Ontology	GO:0009790	5	74	0.0341092	0.108723	HMGCL|SZT2|MECP2|ZFX|STOX2	http://amigo.geneontology.org/cgi-bin/amigo/term_details?term=GO:0009790
autophagy	Gene Ontology	GO:0006914	5	77	0.0394798	0.119433	KIAA0226|ATG9A|PRKAA2|ARSB|TECPR1	http://amigo.geneontology.org/cgi-bin/amigo/term_details?term=GO:0006914
positive regulation of protein phosphorylation	Gene Ontology	GO:0001934	6	103	0.0398111	0.119433	ACVR2A|ANXA2|AXIN2|PLA2G6|PRR5L|SEMA4D	http://amigo.geneontology.org/cgi-bin/amigo/term_details?term=GO:0001934
lipid catabolic process	Gene Ontology	GO:0016042	5	78	0.041378	0.120587	PLA2G6|PLCD4|PLD3|PROCA1|PAFAH1B2	http://amigo.geneontology.org/cgi-bin/amigo/term_details?term=GO:0016042
in utero embryonic development	Gene Ontology	GO:0001701	10	220	0.0431613	0.12229	LY6E|TCTN1|PRMT1|SMAD2|FOXP1|TTN|TPM1|WDR19|B9D1|FGFR1	http://amigo.geneontology.org/cgi-bin/amigo/term_details?term=GO:0001701
innate immune response	Gene Ontology	GO:0045087	26	754	0.0466897	0.128712	MAP4K2|PGLYRP1|NFATC3|TNRC6B|RAF1|MAPKAP1|TANK|NLRX1|PLA2G6|NOD1|ZC3HAV1|PML|ATG9A|ERBB3|NR4A1|FGFR4|MLST8|FGFR1|LRRFIP1|CFD|UBA52|GRB2|PRKACB|CHID1|AGO3|ATF2	http://amigo.geneontology.org/cgi-bin/amigo/term_details?term=GO:0045087
RNA processing	Gene Ontology	GO:0006396	5	82	0.0495154	0.131633	CCNL1|DUSP11|TARBP1|CCNL2|PABPC4	http://amigo.geneontology.org/cgi-bin/amigo/term_details?term=GO:0006396
signal transduction	Gene Ontology	GO:0007165	34	1045	0.0508487	0.131633	CD53|VDR|RTKN|RAPGEF1|MAPK12|RAF1|SH3GL2|YWHAZ|PKIG|TANK|ARAP1|MPP2|CSNK1E|NOD1|PPP1R12A|FGA|TXNRD1|ERBB3|IGF1R|NR4A1|PRKAA2|AR|BRD8|NFAT5|RHPN1|GRB10|EEF1D|RPS6KC1|MAP3K10|CREM|PRKACB|PDE4D|PDE4C|IL15RA	http://amigo.geneontology.org/cgi-bin/amigo/term_details?term=GO:0007165
carbohydrate metabolic process	Gene Ontology	GO:0005975	14	354	0.0516209	0.131633	GLB1L2|B4GALNT1|ARSB|STAB2|NDST2|UBA52|GLB1|MAN2A2|SIAE|ADPGK|YDJC|HS6ST2|PRKACB|CHID1	http://amigo.geneontology.org/cgi-bin/amigo/term_details?term=GO:0005975
response to DNA damage stimulus	Gene Ontology	GO:0006974	8	169	0.054751	0.13621	SPIDR|SGK1|RNF169|CHEK1|MACROD1|MCM8|MICA|ATF2	http://amigo.geneontology.org/cgi-bin/amigo/term_details?term=GO:0006974
Fc-epsilon receptor signaling pathway	Gene Ontology	GO:0038095	12	294	0.0564237	0.137029	ERBB3|NFATC3|NR4A1|MAPKAP1|UBA52|GRB2|TNRC6B|FGFR4|MLST8|RAF1|AGO3|FGFR1	http://amigo.geneontology.org/cgi-bin/amigo/term_details?term=GO:0038095
platelet activation	Gene Ontology	GO:0030168	9	204	0.0620475	0.147182	YWHAZ|CSK|PLSCR1|CFD|GRB2|TTN|DGKA|RAF1|FGA	http://amigo.geneontology.org/cgi-bin/amigo/term_details?term=GO:0030168
apoptotic signaling pathway	Gene Ontology	GO:0097190	6	116	0.0639581	0.148266	APH1A|ARHGEF16|PLEKHG5|MCF2L|UBA52|DIDO1	http://amigo.geneontology.org/cgi-bin/amigo/term_details?term=GO:0097190
mitotic cell cycle	Gene Ontology	GO:0000278	15	403	0.0685365	0.155349	MAU2|CENPK|PMF1|DHFR|FZR1|UBA52|CSNK1E|CEP76|SKA2|POLD4|AURKA|AURKB|CDCA5|MCM8|PPP1R12A	http://amigo.geneontology.org/cgi-bin/amigo/term_details?term=GO:0000278
mitosis	Gene Ontology	GO:0007067	10	243	0.0738836	0.163829	PBRM1|NEK3|PMF1|FZR1|SKA2|PPP1R12A|AURKB|CDCA5|REEP4|AURKA	http://amigo.geneontology.org/cgi-bin/amigo/term_details?term=GO:0007067
positive regulation of I-kappaB kinase/NF-kappaB cascade	Gene Ontology	GO:0043123	7	153	0.0802717	0.170704	PLEKHG5|EEF1D|WLS|UBA52|NOD1|ZC3HAV1|RHOC	http://amigo.geneontology.org/cgi-bin/amigo/term_details?term=GO:0043123
intracellular signal transduction	Gene Ontology	GO:0035556	14	379	0.0803312	0.170704	KMT2C|MAP4K3|MAP4K2|STYXL1|GCOM1|MCF2L|SMAD2|PLCD4|NOD1|PRKACB|IFITM1|DGKA|RAF1|STK38L	http://amigo.geneontology.org/cgi-bin/amigo/term_details?term=GO:0035556
transforming growth factor beta receptor signaling pathway	Gene Ontology	GO:0007179	6	125	0.0847947	0.176511	GDF9|SMAD2|NEDD4L|UBA52|PML|CCNT2	http://amigo.geneontology.org/cgi-bin/amigo/term_details?term=GO:0007179
ATP catabolic process	Gene Ontology	GO:0006200	7	157	0.0891421	0.18185	PEX6|GTF2H1|MSH5|RAD51B|PMS1|SMARCA2|SWSAP1	http://amigo.geneontology.org/cgi-bin/amigo/term_details?term=GO:0006200
regulation of small GTPase mediated signal transduction	Gene Ontology	GO:0051056	7	160	0.0961443	0.192289	ARAP1|ARHGEF16|PLEKHG5|MCF2L|RAPGEF1|RHOC|RAP1GAP2	http://amigo.geneontology.org/cgi-bin/amigo/term_details?term=GO:0051056
apoptotic process	Gene Ontology	GO:0006915	20	605	0.10252	0.201097	YWHAZ|TJP2|BCAP29|SGK1|CLSPN|RAF1|PLSCR1|RTKN|DSP|MAP3K10|DNASE1|KANK2|UBA52|MAPT|PML|NOD1|PPP3CC|PDCD2|TNFRSF6B|PTPRH	http://amigo.geneontology.org/cgi-bin/amigo/term_details?term=GO:0006915
protein transport	Gene Ontology	GO:0015031	14	402	0.114418	0.2202	BBS9|AAGAB|SNX14|NECAP1|AP5B1|MAMDC4|AGAP1|STXBP2|SEC31A|SEC16A|ATG9A|TRIM3|SEC31B|SNX24	http://amigo.geneontology.org/cgi-bin/amigo/term_details?term=GO:0015031
transcription from RNA polymerase II promoter	Gene Ontology	GO:0006366	14	407	0.122814	0.228795	NFIC|NFAT5|CCNT2|MAGOH|PMF1|TBP|GTF2H1|KDM5A|NFATC3|ZNF18|ELL3|ATF2|ZSCAN32|RNMT	http://amigo.geneontology.org/cgi-bin/amigo/term_details?term=GO:0006366
protein dephosphorylation	Gene Ontology	GO:0006470	5	108	0.12337	0.228795	PTPN13|STYXL1|PTPN3|PPP1R12A|PTPRH	http://amigo.geneontology.org/cgi-bin/amigo/term_details?term=GO:0006470
negative regulation of cell proliferation	Gene Ontology	GO:0008285	13	378	0.133564	0.243277	PTH1R|IFITM1|VDR|CHD5|AXIN2|CSK|TBRG1|SMAD2|KANK2|PBRM1|PML|SMARCA2|RAF1	http://amigo.geneontology.org/cgi-bin/amigo/term_details?term=GO:0008285
G2/M transition of mitotic cell cycle	Gene Ontology	GO:0000086	6	143	0.136235	0.243788	CEP76|UBA52|CSNK1E|AURKA|CHEK1|PPP1R12A	http://amigo.geneontology.org/cgi-bin/amigo/term_details?term=GO:0000086
membrane organization	Gene Ontology	GO:0061024	6	144	0.13945	0.24524	YWHAZ|TBC1D1|PRKAA2|UBA52|SEC31A|SH3GL2	http://amigo.geneontology.org/cgi-bin/amigo/term_details?term=GO:0061024
ion transmembrane transport	Gene Ontology	GO:0034220	7	179	0.147168	0.249966	ANO9|SGK1|NEDD4L|UBA52|GRIN3B|TRPM4|RAF1	http://amigo.geneontology.org/cgi-bin/amigo/term_details?term=GO:0034220
positive regulation of transcription from RNA polymerase II promoter	Gene Ontology	GO:0045944	23	749	0.149273	0.249966	FOXP1|SMAD2|VDR|SMARCA2|CCNT2|NFATC3|PPP1R12A|ELL3|DCAF6|GABPB1|CENPK|GTF2H1|AR|NFIC|NFAT5|SNW1|PLSCR1|ARMCX3|MCF2L|TCF7L2|UBA52|CREM|ZMIZ2	http://amigo.geneontology.org/cgi-bin/amigo/term_details?term=GO:0045944
RNA metabolic process	Gene Ontology	GO:0016070	9	247	0.14949	0.249966	YWHAZ|DCP2|SMG6|UBA52|RPS2|EDC4|DUSP11|MAGOH|CNOT4	http://amigo.geneontology.org/cgi-bin/amigo/term_details?term=GO:0016070
glycosaminoglycan metabolic process	Gene Ontology	GO:0030203	5	117	0.15667	0.253656	NDST2|STAB2|HS6ST2|ARSB|GLB1	http://amigo.geneontology.org/cgi-bin/amigo/term_details?term=GO:0030203
nuclear-transcribed mRNA catabolic process, nonsense-mediated decay	Gene Ontology	GO:0000184	5	117	0.15667	0.253656	DCP2|UBA52|SMG6|RPS2|MAGOH	http://amigo.geneontology.org/cgi-bin/amigo/term_details?term=GO:0000184
negative regulation of transcription, DNA-dependent	Gene Ontology	GO:0045892	15	464	0.161838	0.255657	SNW1|WWP2|LRRFIP1|ZHX3|MECP2|ID2|SMAD2|MAP3K10|FOXP1|VDR|TCF7L2|PML|PATZ1|SMARCA2|NR1D2	http://amigo.geneontology.org/cgi-bin/amigo/term_details?term=GO:0045892
cellular lipid metabolic process	Gene Ontology	GO:0044255	6	151	0.162918	0.255657	CPT1B|HMGCL|PRKAA2|ECI1|MCEE|TXNRD1	http://amigo.geneontology.org/cgi-bin/amigo/term_details?term=GO:0044255
transmembrane transport	Gene Ontology	GO:0055085	18	578	0.170491	0.261195	ATP6V0B|SLC44A1|SLC9A6|ANO9|SGK1|RAF1|SLC16A3|NEDD4L|UBA52|SLC25A36|SLC35A2|PRKACB|TRPM4|SLC47A1|CP|SLC39A4|CYB561|SLC12A9	http://amigo.geneontology.org/cgi-bin/amigo/term_details?term=GO:0055085
blood coagulation	Gene Ontology	GO:0007596	15	469	0.171569	0.261195	YWHAZ|CSK|KIF9|PABPC4|CFD|DOCK6|RAD51B|SLC16A3|GRB2|TTN|GRB7|PRKACB|DGKA|RAF1|FGA	http://amigo.geneontology.org/cgi-bin/amigo/term_details?term=GO:0007596
mRNA metabolic process	Gene Ontology	GO:0016071	8	224	0.18062	0.268442	YWHAZ|DCP2|SMG6|UBA52|RPS2|EDC4|MAGOH|CNOT4	http://amigo.geneontology.org/cgi-bin/amigo/term_details?term=GO:0016071
multicellular organismal development	Gene Ontology	GO:0007275	15	474	0.181593	0.268442	KDM1B|HOXD8|AXIN2|CDK13|ID2|MEIS1|KDM5A|ZFP41|HOXA4|CREM|PAEP|ZSCAN2|SPIN1|PHF3|IFRD1	http://amigo.geneontology.org/cgi-bin/amigo/term_details?term=GO:0007275
Wnt receptor signaling pathway	Gene Ontology	GO:0016055	6	157	0.184284	0.268528	WLS|RNF43|PRKAA2|TCF7L2|RNF138|SPIN1	http://amigo.geneontology.org/cgi-bin/amigo/term_details?term=GO:0016055
endocytosis	Gene Ontology	GO:0006897	5	125	0.189008	0.271533	KIAA0226|TNK2|NECAP1|VAMP4|STAB2	http://amigo.geneontology.org/cgi-bin/amigo/term_details?term=GO:0006897
cell surface receptor signaling pathway	Gene Ontology	GO:0007166	6	160	0.195363	0.276764	TNK2|IFITM1|PRMT1|LY6E|BRD8|MADD	http://amigo.geneontology.org/cgi-bin/amigo/term_details?term=GO:0007166
regulation of transcription, DNA-dependent	Gene Ontology	GO:0006355	36	1305	0.236634	0.326364	CCNL1|KDM1B|ZFX|PRKAA2|MAPK12|PATZ1|NR1D2|CCNT2|SMARCA2|ZNF780B|ZNF276|ZNF721|ZNF600|SERTAD3|CHD5|ZFP41|CAMTA1|PML|ZKSCAN5|CREM|KMT2C|CCNL2|PRMT1|CHD3|BRD8|ZNF879|ZNF800|ARID3B|PMF1|CIRH1A|EEF1D|ZBTB44|ZKSCAN4|PBRM1|ZNF548|ATF2	http://amigo.geneontology.org/cgi-bin/amigo/term_details?term=GO:0006355
angiogenesis	Gene Ontology	GO:0001525	7	206	0.236774	0.326364	ANXA2|STAB2|HOXB3|MMP19|TYMP|ADAM15|FGFR1	http://amigo.geneontology.org/cgi-bin/amigo/term_details?term=GO:0001525
RNA splicing	Gene Ontology	GO:0008380	8	247	0.254502	0.346123	SREK1|PRPF38B|ARL6IP4|SON|U2AF1L4|PTBP3|MAGOH|THOC5	http://amigo.geneontology.org/cgi-bin/amigo/term_details?term=GO:0008380
defense response to virus	Gene Ontology	GO:0051607	5	145	0.278282	0.373483	PML|IFITM1|ZC3HAV1|MICA|PLSCR1	http://amigo.geneontology.org/cgi-bin/amigo/term_details?term=GO:0051607
translation	Gene Ontology	GO:0006412	8	259	0.296348	0.387796	MRPL18|EEF1D|PABPC4|EIF5|EIF3F|UBA52|SSR4|RPS2	http://amigo.geneontology.org/cgi-bin/amigo/term_details?term=GO:0006412
axon guidance	Gene Ontology	GO:0007411	10	334	0.29655	0.387796	RAF1|COL4A5|GRB2|NUMB|RHOC|SEMA6D|FGFR1|SEMA4D|SEMA4F|SH3GL2	http://amigo.geneontology.org/cgi-bin/amigo/term_details?term=GO:0007411
G1/S transition of mitotic cell cycle	Gene Ontology	GO:0000082	5	151	0.306641	0.395917	DHFR|UBA52|CDCA5|CAMK2G|MCM8	http://amigo.geneontology.org/cgi-bin/amigo/term_details?term=GO:0000082
cytokine-mediated signaling pathway	Gene Ontology	GO:0019221	7	229	0.32389	0.41024	IFITM1|DUOX1|CAMK2G|UBA52|PML|PTPRN|IL15RA	http://amigo.geneontology.org/cgi-bin/amigo/term_details?term=GO:0019221
lipid metabolic process	Gene Ontology	GO:0006629	5	155	0.325779	0.41024	PLA2G6|GDPD3|CPNE1|GDPD5|PAFAH1B2	http://amigo.geneontology.org/cgi-bin/amigo/term_details?term=GO:0006629
small GTPase mediated signal transduction	Gene Ontology	GO:0007264	10	348	0.341062	0.424247	TNK2|ARAP1|ARHGEF16|PLEKHG5|DOCK6|MCF2L|AGAP1|RAPGEF1|RHOC|RAF1	http://amigo.geneontology.org/cgi-bin/amigo/term_details?term=GO:0007264
regulation of apoptotic process	Gene Ontology	GO:0042981	5	166	0.378888	0.465622	NOD1|MADD|RAF1|UBA52|SGK1	http://amigo.geneontology.org/cgi-bin/amigo/term_details?term=GO:0042981
cell death	Gene Ontology	GO:0008219	6	207	0.39055	0.472076	B4GALNT1|SPG7|TBP|PLA2G6|AR|SYNE1	http://amigo.geneontology.org/cgi-bin/amigo/term_details?term=GO:0008219
vesicle-mediated transport	Gene Ontology	GO:0016192	5	169	0.393397	0.472076	CYTH1|SAR1A|CPNE1|BCAP29|SEC31B	http://amigo.geneontology.org/cgi-bin/amigo/term_details?term=GO:0016192
positive regulation of apoptotic process	Gene Ontology	GO:0043065	8	294	0.424607	0.503603	APH1A|ARHGEF16|PLEKHG5|NR4A1|MCF2L|TCF7L2|MAP3K10|UBA52	http://amigo.geneontology.org/cgi-bin/amigo/term_details?term=GO:0043065
brain development	Gene Ontology	GO:0007420	5	181	0.450983	0.52399	IGF1R|HMX3|CSK|TCF7L2|PAFAH1B2	http://amigo.geneontology.org/cgi-bin/amigo/term_details?term=GO:0007420
positive regulation of transcription, DNA-dependent	Gene Ontology	GO:0045893	13	503	0.45207	0.52399	SERTAD3|KMT2E|TBP|MECP2|ID2|SMARCA2|NPAT|AR|SMAD2|PATZ1|NR1D2|MYRF|KDM5A	http://amigo.geneontology.org/cgi-bin/amigo/term_details?term=GO:0045893
transport	Gene Ontology	GO:0006810	9	349	0.477354	0.54235	SLC9A6|SLC25A19|SEC14L1|HERC1|AR|SLC25A36|PAEP|SLC25A14|SLC19A1	http://amigo.geneontology.org/cgi-bin/amigo/term_details?term=GO:0006810
small molecule metabolic process	Gene Ontology	GO:0044281	35	1413	0.482022	0.54235	STAB2|DHFR|PRKAA2|MOCS2|EPT1|GGPS1|UQCRB|CYP11A1|CYP3A5|NDST2|DCTD|TYMP|PLA2G6|UBA52|MCEE|PTS|LSS|SLC44A1|CPT1B|HMGCL|CA12|ALOX12B|RTEL1|GSTT2B|ARSB|PLD3|GSTM1|SLC16A3|GLB1|PPIP5K2|ECI1|HS6ST2|PRKACB|TXNRD1|SLC19A1	http://amigo.geneontology.org/cgi-bin/amigo/term_details?term=GO:0044281
viral reproduction	Gene Ontology	GO:0016032	14	555	0.483862	0.54235	SNW1|CDK13|GTF2H1|NEDD4L|UBA52|GRB2|RPS2|TBP|PML|CCNT2|NLRX1|MICB|MICA|RNMT	http://amigo.geneontology.org/cgi-bin/amigo/term_details?term=GO:0016032
cell differentiation	Gene Ontology	GO:0030154	10	395	0.494552	0.548308	HMX3|CREM|ZHX3|CAMK2G|MMP19|ZFP41|TYMP|GRB2|HERC4|ZSCAN2	http://amigo.geneontology.org/cgi-bin/amigo/term_details?term=GO:0030154
nervous system development	Gene Ontology	GO:0007399	7	278	0.517119	0.567163	CAMK2G|SPG7|ARID1B|TMEM41B|TRIM3|SMARCA2|SEMA4F	http://amigo.geneontology.org/cgi-bin/amigo/term_details?term=GO:0007399
proteolysis	Gene Ontology	GO:0006508	5	211	0.586436	0.636346	CFD|SPG7|C9orf3|TMPRSS5|MMP19	http://amigo.geneontology.org/cgi-bin/amigo/term_details?term=GO:0006508
positive regulation of cell proliferation	Gene Ontology	GO:0008284	10	429	0.60015	0.63934	PTH1R|GDF9|CDK13|MECP2|FZR1|IGF1R|AR|TRPM4|FGFR4|FGFR1	http://amigo.geneontology.org/cgi-bin/amigo/term_details?term=GO:0008284
cell proliferation	Gene Ontology	GO:0008283	8	344	0.601732	0.63934	AXIN2|IL15RA|TCF7L2|AR|AURKB|CKLF|RAF1|TXNRD1	http://amigo.geneontology.org/cgi-bin/amigo/term_details?term=GO:0008283
extracellular matrix organization	Gene Ontology	GO:0030198	7	312	0.639109	0.672053	DST|MMP19|COL4A5|ADAM15|COL26A1|FGA|DAG1	http://amigo.geneontology.org/cgi-bin/amigo/term_details?term=GO:0030198
cellular protein metabolic process	Gene Ontology	GO:0044267	11	530	0.746983	0.777473	ARSB|HYOU1|MOGS|MAN2A2|EIF3F|EIF5|UBA52|SSR4|RPS2|EEF1D|SEC31A	http://amigo.geneontology.org/cgi-bin/amigo/term_details?term=GO:0044267
negative regulation of apoptotic process	Gene Ontology	GO:0043066	9	475	0.821395	0.846285	YWHAZ|IGF1R|SEMA4D|PRKAA2|SON|UBA52|FIGNL1|RAF1|TNFRSF6B	http://amigo.geneontology.org/cgi-bin/amigo/term_details?term=GO:0043066
synaptic transmission	Gene Ontology	GO:0007268	6	389	0.915265	0.93357	EPB41L1|SYT2|CAMK2G|KCNN4|PRKACB|RAF1	http://amigo.geneontology.org/cgi-bin/amigo/term_details?term=GO:0007268
immune response	Gene Ontology	GO:0006955	7	476	0.947193	0.956571	IGF1R|MAP4K2|PGLYRP1|IL32|SEMA4D|MICB|MICA	http://amigo.geneontology.org/cgi-bin/amigo/term_details?term=GO:0006955
cell adhesion	Gene Ontology	GO:0007155	5	445	0.985072	0.985072	IL32|DST|SEMA4D|PDZD2|STAB2	http://amigo.geneontology.org/cgi-bin/amigo/term_details?term=GO:0007155
